# Supplementary material
Source: PubMed Central journal article supplement (PMC4860109)
Supplement: NIHMS753233-supplement-Supplemental_Data_File___doc___tif__pdf__etc__.pdf [file NIHMS753233-supplement-Supplemental_Data_File___doc___tif__pdf__etc__.pdf]

## Supplemental Digital Content 1, PubMed Database Search Entry, May 2015

(community health workers[Mesh] OR caregivers[Mesh] OR health personnel[Mesh] OR emergency medical services[Mesh] OR health personnel[Mesh] OR health services[Mesh] OR home care services[Mesh] OR maternal health services[Mesh] OR medical staff[Mesh] OR mentors[Mesh] OR nursing staff[Mesh] OR patient care team[Mesh] OR peer group[Mesh] OR rural health services [Mesh])

AND

(cellular phone[Mesh] OR computersOR handheld[Mesh] OR internet[Mesh] OR medical records[Mesh] OR systemsOR computerized[Mesh] OR mobile applications[Mesh] OR software[Mesh] OR text messaging[Mesh] OR user-computer interface [Mesh])

AND

(appointments and schedules[Mesh] OR data collection[Mesh] OR decision support systems[Mesh] OR delivery of health care[Mesh] OR disease management[Mesh] OR health care surveys[Mesh] OR interviews as topic[Mesh] OR mass screening[Mesh] OR medication adherence[Mesh] OR population surveillance[Mesh] OR public health/education[Mesh] OR questionnaires[Mesh] OR remote consultation[Mesh] OR time factors [Mesh])

AND

(communication[Mesh] OR costs and cost analysis[Mesh] OR health behavior[Mesh] OR health communication[Mesh] OR health knowledge[Mesh] OR patient acceptance of health care[Mesh] OR patient compliance[Mesh] OR quality of health care[Mesh] OR treatment outcome [Mesh])
